# Supplementary material for: Observation-based gridded runoff estimates for Europe (E-RUNversion 1.1)
Source: Copernicus journal article supplement (doi:10.5194/essd-8-279-2016), 2016-07-07
Supplement: Supplementary file [file essd-8-279-2016-supplement-title-page.pdf › essd-8-279-2016-supplement-title-page.pdf]

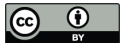

## *Supplement of*

# **Observation-based gridded runoff estimates for Europe (E-RUN version 1.1)**

**Lukas Gudmundsson and Sonia I. Seneviratne**

*Correspondence to:* Lukas Gudmundsson ([lukas.gudmundsson@env.ethz.ch](mailto:lukas.gudmundsson@env.ethz.ch))

- [essd-8-279-2016-supplement-title-page.pdf](#)
- ERDB\_METADATA
  - [ERDB\\_METADATA.csv](#)

The copyright of individual parts of the supplement might differ from the CC-BY 3.0 licence.
